# Supplementary material for: The Assessment of the Combined Treatment of 5-ALA Mediated Photodynamic Therapy and Thalidomide on 4T1 Breast Carcinoma and 2H11 Endothelial Cell Line
Source: MDPI journal article supplement (doi:10.3390/molecules25215184), 2020-11-07
Supplement: s1 [file s1]

## SUPPLEMENTARY

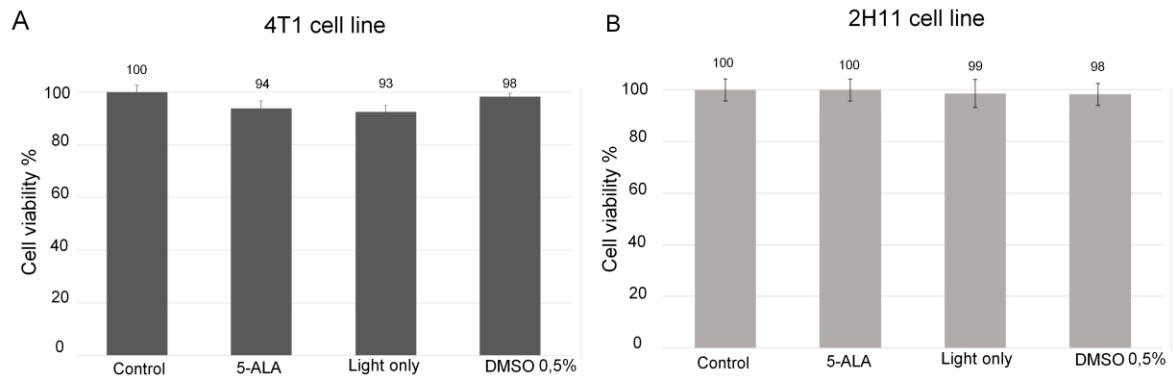

**Figure S1.** Results of MTT assay on 4T1 (**A**) and 2H11 (**B**) cells in control groups: control cells without any treatment, cells treated with 3 mM concentration of 5-aminolevulinic acid, cells irradiated during 83 s exposure with 50 mW/cm<sup>2</sup> at the wavelength 630+/-20 nm, 0.5% DMSO treated cells. Results are presented as means  $\pm$  standard deviations ( $n = 3$ ).
